# Supplementary material
Source: PubMed Central journal article supplement (PMC3874130)
Supplement: NIHMS521612-supplement-1.pdf [file NIHMS521612-supplement-1.pdf]

Table S1. Reactions and Kinetic Parameters for Bradykinin Receptor Activation, Related to Figure 3

| Name                                                         | Reaction                                                                   | Reaction Type | Kinetic parameters                                                               | References and Notes                                                                                                                                                                 |
|--------------------------------------------------------------|----------------------------------------------------------------------------|---------------|----------------------------------------------------------------------------------|--------------------------------------------------------------------------------------------------------------------------------------------------------------------------------------|
| Bradykinin receptor binds ligand and GRK near simultaneously | $B_2R + \text{Bradykinin} + \text{GRK} \leftrightarrow B_2R\_p$            | Binding       | $K_{on}=10 \mu\text{M}^{-1}\cdot\text{s}^{-1}$<br>$K_{off}=0.033 \text{ s}^{-1}$ | The binding affinity of $B_2R$ to bradykinin is $\sim 3\text{nM}$ (Gera et al., 2011). Varying $k_{on}$ and $k_{off}$ such that the ratio was maintained did not change the results. |
| Arrestin binds $B_2R\_p$                                     | $B_2R\_p + \text{arrestin} \leftrightarrow \text{Arrestin bound receptor}$ | Binding       | $K_{on}=0.45 \mu\text{M}^{-1}\cdot\text{s}^{-1}$<br>$K_{off}=1.0 \text{ s}^{-1}$ | We used the same values as arrestin binding $\beta\text{AR}$ (Vayttaden et al., 2010).                                                                                               |

These reactions were taken from (Gera et al., 2011) and (Vayttaden et al., 2010).

Table S2. Initial Concentrations and Diffusivities for Bradykinin Receptor Signaling, Related to Figure 3

| <b>Initial concentrations for bradykinin receptor signaling (Figure 3)</b>       |                                                               |                                                |
|----------------------------------------------------------------------------------|---------------------------------------------------------------|------------------------------------------------|
| <b>Name</b>                                                                      | <b>Initial concentration</b>                                  | <b>Compartment</b>                             |
| GRK                                                                              | 0.2 $\mu\text{M}$                                             | Cytoplasm                                      |
| Arrestin                                                                         | 1 $\mu\text{M}$                                               | Cytoplasm                                      |
| Bradykinin                                                                       | 1.0 $\mu\text{M}$                                             | Extracellular space                            |
| B <sub>2</sub> R_p                                                               | 0 molecules/ $\mu\text{m}^2$                                  | Plasma membrane                                |
| Arrestin bound receptor                                                          | 0 molecules/ $\mu\text{m}^2$                                  | Plasma membrane                                |
| B <sub>2</sub> R                                                                 | 100 molecules/ $\mu\text{m}^2$                                | Plasma membrane                                |
| <b>Diffusion coefficients for B<sub>2</sub>R signaling (Related to Figure 3)</b> |                                                               |                                                |
| <b>Name</b>                                                                      | <b>Diffusivity (<math>\mu\text{m}^2.\text{s}^{-1}</math>)</b> | <b>References/Notes</b>                        |
| B <sub>2</sub> R                                                                 | 0.2                                                           | (Philip et al., 2007)                          |
| B <sub>2</sub> R_p                                                               | 0.2                                                           | (Philip et al., 2007)                          |
| Arrestin bound receptor                                                          | 0.002                                                         | (Philip et al., 2007; Slepak and Hurley, 2007) |
| GRK                                                                              | 1                                                             | assumed                                        |
| Arrestin                                                                         | 1                                                             | assumed                                        |

Table S3. Reactions and Kinetic Parameters for EGF Signaling, Related to Figure 4

| Name                       | Reaction                                                                                 | Reaction Type | Kinetic parameters                                                                                 |
|----------------------------|------------------------------------------------------------------------------------------|---------------|----------------------------------------------------------------------------------------------------|
| EGF binds receptor         | $\text{EGF} + \text{EGFR} \leftrightarrow \text{EGF-EGFR}$                               | Binding       | $K_{\text{on}}=1 \mu\text{M}^{-1} \cdot \text{s}^{-1}$<br>$K_{\text{off}}=0.0001 \text{s}^{-1}$    |
| EGFR dimerization          | $2 \text{EGF-EGFR} \leftrightarrow \text{EGFR\_active}$                                  | Binding       | $K_{\text{on}}=1 \mu\text{M}^{-1} \cdot \text{s}^{-1}$<br>$K_{\text{off}}=0.1 \text{s}^{-1}$       |
| SHC phosphorylation        | $\text{SHC} + \text{EGFR\_active} \leftrightarrow \text{SHC-p}$                          | Enzymatic     | $K_{\text{m}}=1 \mu\text{M}$<br>$K_{\text{cat}}=0.05 \text{s}^{-1}$                                |
| SHC inactivation           | $\text{SHC-p} \leftrightarrow \text{SHC}$                                                | Inactivation  | $K_{\text{on}}=0.001 \text{s}^{-1}$                                                                |
| Sos-Grb2 binding           | $\text{Sos} + \text{Grb2} \leftrightarrow \text{Sos-Grb2}$                               | Binding       | $K_{\text{on}}=0.25 \mu\text{M}^{-1} \cdot \text{s}^{-1}$<br>$K_{\text{off}}=0.0168 \text{s}^{-1}$ |
| Shc-p binds PDGFR          | $\text{EGF-EGFR} + \text{Shc-p} \leftrightarrow \text{EGF-EGFR-Shcp}$                    | Binding       | $K_{\text{on}}=6.0 \mu\text{M}^{-1} \cdot \text{s}^{-1}$<br>$K_{\text{off}}=0.3 \text{s}^{-1}$     |
| SHC binding Sos-Grb2       | $\text{Sos-Grb2} + \text{EGF-EGFR-SHC-p} \leftrightarrow \text{EGF-EGFR-Sos-Grb2-Shc-p}$ | Binding       | $K_{\text{on}}=0.5 \mu\text{M}^{-1} \cdot \text{s}^{-1}$<br>$K_{\text{off}}=0.1 \text{s}^{-1}$     |
| Ras activation             | $\text{Ras-GDP} + \text{EGF-EGFR-Sos-Grb2-Shc-p} \leftrightarrow \text{Ras-GTP}$         | Enzymatic     | $K_{\text{m}} = 0.5 \mu\text{M}$<br>$K_{\text{cat}} = 0.05 \text{s}^{-1}$                          |
| Ras inactivation           | $\text{Ras-GTP} \leftrightarrow \text{Ras-GDP}$                                          | Inactivation  | $K_{\text{on}} = 0.002 \text{s}^{-1}$                                                              |
| Raf activation             | $\text{Raf} + \text{Ras-GTP} \leftrightarrow \text{Raf}^*$                               | Enzymatic     | $K_{\text{m}}=0.5 \mu\text{M}$<br>$K_{\text{cat}}=1 \text{s}^{-1}$                                 |
| Raf inactivation           | $\text{Raf}^* + \text{PP2A} \leftrightarrow \text{Raf}$                                  | Enzymatic     | $K_{\text{m}}=15.7 \mu\text{M}$<br>$K_{\text{cat}}=5 \text{s}^{-1}$                                |
| MEK activation             | $\text{MEK} + \text{Raf}^* \leftrightarrow \text{MEK}^*$                                 | Enzymatic     | $K_{\text{m}}=0.1591 \mu\text{M}$<br>$K_{\text{cat}}=0.105 \text{s}^{-1}$                          |
| MEK inactivation           | $\text{MEK}^* + \text{PP2A} \leftrightarrow \text{MEK}$                                  | Enzymatic     | $K_{\text{m}}=15.7 \mu\text{M}$<br>$K_{\text{cat}}=5 \text{s}^{-1}$                                |
| MAPK activation            | $\text{MAPK} + \text{MEK}^* \leftrightarrow \text{MAPK}^*$                               | Enzymatic     | $K_{\text{m}}=0.1591 \mu\text{M}$<br>$K_{\text{cat}}=0.105 \text{s}^{-1}$                          |
| MAPK inactivation          | $\text{MAPK}^* + \text{PTP} \leftrightarrow \text{MAPK}$                                 | Enzymatic     | $K_{\text{m}}=0.46 \mu\text{M}$<br>$K_{\text{cat}}=1.02 \text{s}^{-1}$                             |
| Ras-GAP                    | $\text{Ras-GTP} + \text{Ras-GAP} \leftrightarrow \text{Ras-GDP}$                         | Enzymatic     | $K_{\text{m}}=1.0 \mu\text{M}$<br>$K_{\text{cat}}=0.01 \text{s}^{-1}$                              |
| MAPK nuclear translocation | $\text{MAPK}^* \leftrightarrow \text{MAPK\_nucleus}$                                     | First order   | $K_{\text{f}}=1.0 \text{s}^{-1}$<br>$K_{\text{b}}=0.1 \text{s}^{-1}$                               |

These reactions were taken from (Bhalla et al., 2002).

Table S4. Initial Concentrations for EGF Signaling, Related to Figure 4

| <b>Name</b>             | <b>Initial concentration</b>   | <b>Compartment</b>  |
|-------------------------|--------------------------------|---------------------|
| Raf                     | 0.2 $\mu\text{M}$              | Cytoplasm           |
| Raf*                    | 0 $\mu\text{M}$                | Cytoplasm           |
| PP2A                    | 0.1 $\mu\text{M}$              | Cytoplasm           |
| PTP                     | 0.1 $\mu\text{M}$              | Cytoplasm           |
| MEK                     | 0.18 $\mu\text{M}$             | Cytoplasm           |
| MEK*                    | 0 $\mu\text{M}$                | Cytoplasm           |
| MAPK                    | 0.36 $\mu\text{M}$             | Cytoplasm           |
| MAPK*                   | 0 $\mu\text{M}$                | Cytoplasm           |
| Ras-GAP                 | 0.002 $\mu\text{M}$            | Cytoplasm           |
| EGF                     | 1.0 $\mu\text{M}$              | Extracellular space |
| EGF-EGFR                | 0 molecules/ $\mu\text{m}^2$   | Plasma membrane     |
| EGF-EGFR-Shcp           | 0 molecules/ $\mu\text{m}^2$   | Plasma membrane     |
| Ras-GTP                 | 0 molecules/ $\mu\text{m}^2$   | Plasma membrane     |
| Shc-p                   | 0 $\mu\text{M}$                | Cytoplasm           |
| Sos                     | 0.1 $\mu\text{M}$              | Cytoplasm           |
| Grb2                    | 1.0 $\mu\text{M}$              | Cytoplasm           |
| Sos-Grb2                | 1.0 $\mu\text{M}$              | Cytoplasm           |
| EGF-EGFR-Sos-Grb2-Shc-p | 0 molecules/ $\mu\text{m}^2$   | Plasma membrane     |
| Ras-GDP                 | 500 molecules/ $\mu\text{m}^2$ | Plasma membrane     |
| EGFR                    | 250 molecules/ $\mu\text{m}^2$ | Plasma membrane     |
| Shc                     | 0.1 $\mu\text{M}$              | Cytoplasm           |

These values were obtained from (Bhalla et al., 2002; Fujioka et al., 2006).

Table S5. Diffusion Constants for the Components in the EGFR Pathway, Related to Figure 4

| <b>Calculation of diffusion constants (Mayawala et al., 2006)</b> |                               |                                                               |                                                                                             |
|-------------------------------------------------------------------|-------------------------------|---------------------------------------------------------------|---------------------------------------------------------------------------------------------|
| <b>Name</b>                                                       | <b>Molecular weight (kDa)</b> | <b>Diffusivity (<math>\mu\text{m}^2.\text{s}^{-1}</math>)</b> | <b>Notes and References</b>                                                                 |
| EGFR (dimer)                                                      | 268                           | 0.08                                                          | (Mayawala et al., 2006)                                                                     |
| EGFR (monomer)                                                    | 134                           | 0.112                                                         | Calculated from Eqn. (S41)                                                                  |
| EGFR-Shc                                                          | 268+50                        | 0.073                                                         | Calculated from Eqn. (S41)                                                                  |
| EGFR-Shc-Sos-Grb2                                                 | 268+50+150+28                 | 0.058                                                         | Calculated from Eqn. (S41)                                                                  |
| Shc                                                               | 50                            | 6.4                                                           | Calculated from Eqn. (S41)                                                                  |
| Sos                                                               | 150                           | 3.7                                                           | Calculated from Eqn. (S41)                                                                  |
| Grb2                                                              | 28                            | 8.5                                                           | Calculated from Eqn. (S41)                                                                  |
| Ras-GAP                                                           | 120                           | 4.14                                                          | Calculated from Eqn. (S41)                                                                  |
| <b>Diffusivities of components in the EGF signaling pathway</b>   |                               |                                                               |                                                                                             |
| <b>Name</b>                                                       | <b>Diffusion coefficient</b>  | <b>Compartment</b>                                            | <b>Notes and References</b>                                                                 |
| Raf                                                               | $6.0 \mu\text{m}^2/\text{s}$  | Cytoplasm                                                     | (Storm et al., 1990)                                                                        |
| Raf*                                                              | $6.0 \mu\text{m}^2/\text{s}$  | Cytoplasm                                                     | (Storm et al., 1990)                                                                        |
| PP2A                                                              | $0 \mu\text{m}^2/\text{s}$    | Cytoplasm                                                     | PP2A is present uniformly in the cytoplasm                                                  |
| MEK                                                               | $7.0 \mu\text{m}^2/\text{s}$  | Cytoplasm                                                     | (Fujioka et al., 2006; Seger et al., 1992),                                                 |
| MEK*                                                              | $7.0 \mu\text{m}^2/\text{s}$  | Cytoplasm                                                     | (Bhalla et al., 2002; Fujioka et al., 2006; Seger et al., 1992),                            |
| MAPK                                                              | $7.0 \mu\text{m}^2/\text{s}$  | Cytoplasm                                                     | (Bhalla et al., 2002; Sanghera et al., 1990)                                                |
| MAPK*                                                             | $7.0 \mu\text{m}^2/\text{s}$  | Cytoplasm                                                     | (Bhalla et al., 2002; Fujioka et al., 2006; Kholodenko et al., 1999; Sanghera et al., 1990) |

|                         |                                |                     |                                                                                                                                         |
|-------------------------|--------------------------------|---------------------|-----------------------------------------------------------------------------------------------------------------------------------------|
| Ras-GAP                 | 4.14 $\mu\text{m}^2/\text{s}$  | Cytoplasm           | See above part of Table                                                                                                                 |
| EGF                     | 1.0 $\mu\text{m}^2/\text{s}$   | Extracellular space | Assumed                                                                                                                                 |
| EGF-EGFR                | 0.08 $\mu\text{m}^2/\text{s}$  | Plasma membrane     | See above part of Table                                                                                                                 |
| EGF-EGFR-Shcp           | 0.073 $\mu\text{m}^2/\text{s}$ | Plasma membrane     | See above part of Table                                                                                                                 |
| Ras-GTP                 | 0.16 $\mu\text{m}^2/\text{s}$  | Plasma membrane     | (Bhalla et al., 2002; Kholodenko et al., 1999; Lommerse et al., 2006) We assume the diffusivity of GDP and GTP bound forms are similar. |
| Shc-p                   | 6.4 $\mu\text{m}^2/\text{s}$   | Cytoplasm           | See above part of Table                                                                                                                 |
| Sos                     | 3.7 $\mu\text{m}^2/\text{s}$   | Cytoplasm           | See above part of Table                                                                                                                 |
| Grb2                    | 8.5 $\mu\text{m}^2/\text{s}$   | Cytoplasm           | See above part of Table                                                                                                                 |
| EGF-EGFR-Sos-Grb2-Shc-p | 0.058 $\mu\text{m}^2/\text{s}$ | Plasma membrane     | See above part of Table                                                                                                                 |
| Ras-GDP                 | 0.16 $\mu\text{m}^2/\text{s}$  | Plasma membrane     | (Kholodenko et al., 1999; Lommerse et al., 2006; Storm et al., 1990)                                                                    |
| EGFR                    | 0.112 $\mu\text{m}^2/\text{s}$ | Plasma membrane     | (Mayawala et al., 2006; Storm et al., 1990),                                                                                            |
| Shc                     | 6.4 $\mu\text{m}^2/\text{s}$   | Cytoplasm           | See above part of Table                                                                                                                 |

Table S6. Reactions, Kinetic Parameters, Initial Values, and Diffusivities for PDGF Signaling, Related to Figure 6

| Name                                                             | Reaction                                                       | Reaction Type       | Kinetic parameters                                                                                                                                                 |
|------------------------------------------------------------------|----------------------------------------------------------------|---------------------|--------------------------------------------------------------------------------------------------------------------------------------------------------------------|
| PDGF binds receptor                                              | $\text{PDGF} + \text{PDGFR} \leftrightarrow \text{PDGF-PDGFR}$ | Binding             | $K_{\text{on}}=1 \mu\text{M}^{-1}\cdot\text{s}^{-1}$<br>$K_{\text{off}}=0.01\text{s}^{-1}$                                                                         |
| Src phosphorylation                                              | $\text{Src} + \text{PDGF-PDGFR} \leftrightarrow \text{Src-p}$  | Enzymatic           | $K_{\text{m}}=1 \mu\text{M}$<br>$K_{\text{cat}}=0.1 \text{s}^{-1}$                                                                                                 |
| Src inactivation                                                 | $\text{Src-p} + \text{Csk\_active} \leftrightarrow \text{Src}$ | Inactivation        | $K_{\text{m}}=1.5 \mu\text{M}$<br>$K_{\text{cat}}=0.3 \text{s}^{-1}$                                                                                               |
| Csk activation                                                   | $\text{Csk} \rightarrow \text{Csk\_active}$                    | Activation          | $k_{\text{f}}=0.001 \text{s}^{-1}$                                                                                                                                 |
| <b>Initial concentrations for PDGF signaling (Figure 6)</b>      |                                                                |                     |                                                                                                                                                                    |
| Name                                                             | Initial concentration                                          | Compartment         | Notes and References                                                                                                                                               |
| PDGF                                                             | 0 $\mu\text{M}$                                                | Extracellular space | These values were based on the numbers used in the EGF signaling pathway.                                                                                          |
| PDGF                                                             | 250 molecules. $\mu\text{m}^{-2}$                              | Receptor            |                                                                                                                                                                    |
| Src                                                              | 0.1 $\mu\text{M}$                                              | Cytoplasm           |                                                                                                                                                                    |
| Csk                                                              | 0.1 $\mu\text{M}$                                              | Cytoplasm           |                                                                                                                                                                    |
| <b>Diffusivities of components in the PDGF signaling pathway</b> |                                                                |                     |                                                                                                                                                                    |
| Name                                                             | Diffusion coefficient                                          | Compartment         |                                                                                                                                                                    |
| Csk_inactive                                                     | 10.0 $\mu\text{m}^2/\text{s}$                                  | Cytoplasm           | Assumed to be in the same order of magnitude as MAPK.                                                                                                              |
| Csk_active                                                       | 10.0 $\mu\text{m}^2/\text{s}$                                  | Cytoplasm           | Assumed to be in the same order of magnitude as MAPK.                                                                                                              |
| Src_active                                                       | 1 $\mu\text{m}^2/\text{s}$                                     | Cytoplasm           | Active Src undergoes many chemical transformations including myristoylation and mechanical activation. We assumed that phosho-Src diffuses slowly compared to Src. |
| Src                                                              | 10.0 $\mu\text{m}^2/\text{s}$                                  | Cytoplasm           | Assumed to be in the same order of magnitude as MAPK.                                                                                                              |
| PDGF                                                             | 1.0 $\mu\text{m}^2/\text{s}$                                   | Cytoplasm           | Assumed                                                                                                                                                            |
| PDGFR                                                            | 0.041 $\mu\text{m}^2/\text{s}$                                 | Cytoplasm           | (Fujioka et al., 2006; Ljungquist-Hoddelius et al., 1991; Seger et al., 1992)                                                                                      |
| PDGF-PDGFR                                                       | 0.041 $\mu\text{m}^2/\text{s}$                                 | Cytoplasm           | (Ljungquist-Hoddelius et al., 1991)                                                                                                                                |
